# Supplementary material for: NAC103 mutation alleviates DNA damage in an Arabidopsis thaliana mutant sensitive to excess boron
Source: PubMed Central journal article supplement (PMC10090426; doi:10.3389/fpls.2023.1099816), 2023-03-29
Supplement: DataSheet_1.pdf [file DataSheet_1.pdf]

## Supplementary Material

### 1 Supplementary Figures and Tables

#### 1.1 Supplementary Figures

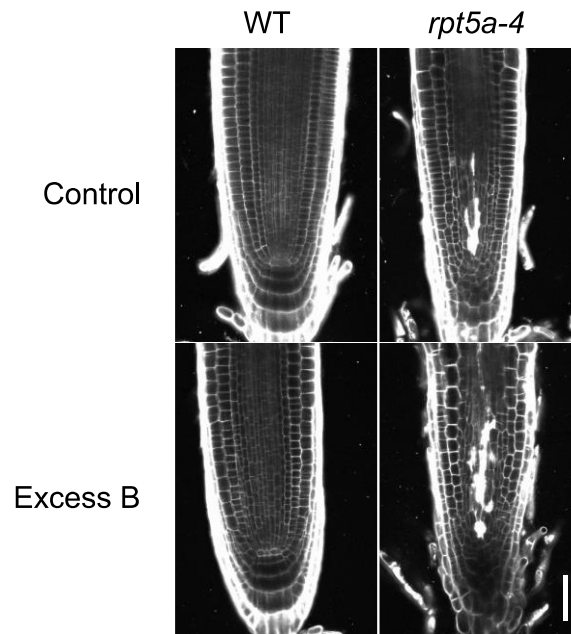

**Supplementary Figure 1.** Cell death observed in *rpt5a* mutant under excess boron conditions. Confocal microscopy of root meristems. Six-day-old seedlings grown under the control condition were treated with control or excess boron conditions for three days. Cell walls and dead cells were visualized with propidium iodide. Bar, 50  $\mu$ m.

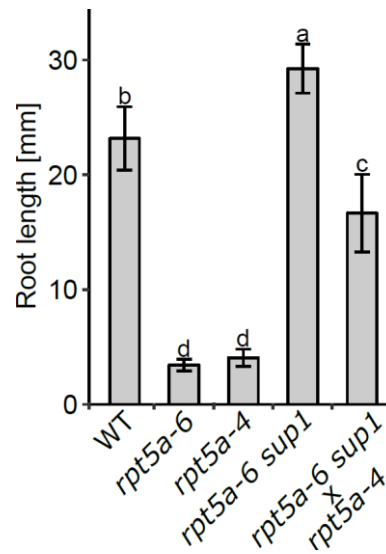

**Supplementary Figure 2.** Primary root length of *rpt5a-6 sup1* x *rpt5a-4 F1* under excess boron conditions. Seedling were grown for 10 days under excess boron (3 mM boric acid) condition. Values are mean  $\pm$  standard deviation of 4-5 biological replicates. Groups sharing the same alphabets are not significantly different at  $p < 0.05$  by Tukey-Kramer's test.

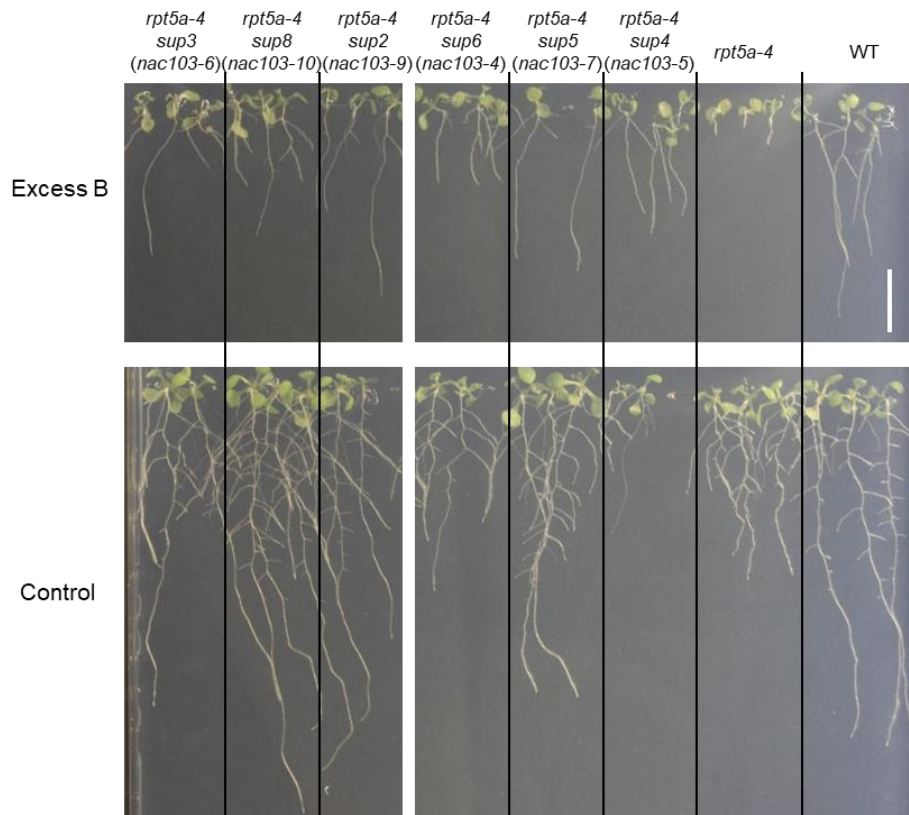

**Supplementary Figure 3.** Phenotype of *rpt5a-4* suppressor mutants. *rpt5a-4* suppressor mutants were grown for 10 days under excess boron (3 mM boric acid) or control (30  $\mu$ M boric acid) conditions. Scale bar, 10 mm.

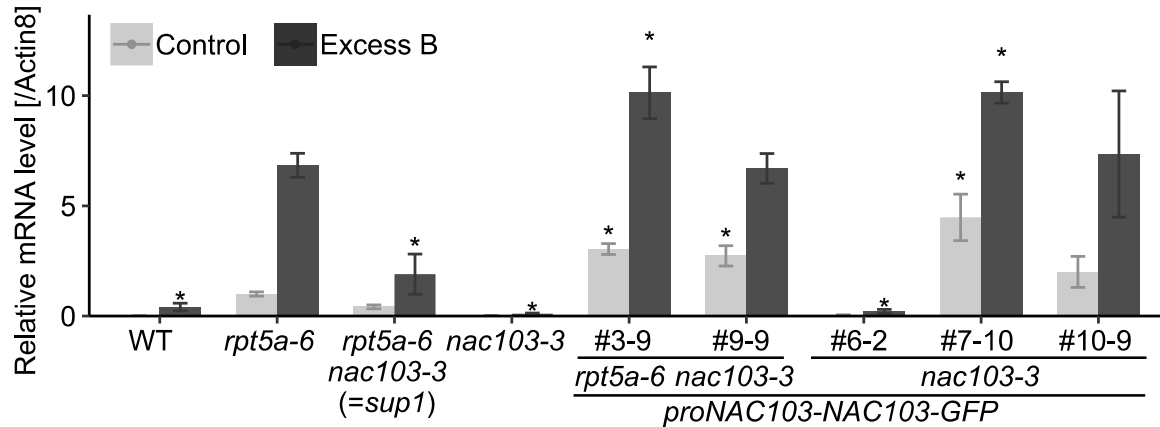

**Supplementary Figure 4.** *NAC103* mRNA accumulation in *rpt5a-6* mutant and *NAC103* overexpression lines. Seedlings were precultured in normal conditions (30  $\mu$ M boric acid) for eight days and then grown on excess boron (3 mM boric acid) or control conditions for five days. Total RNA was extracted from whole root and *NAC103* mRNA accumulation was quantified by qRT-PCR. Expression levels were normalized by *Actin8*, and values are expressed relative to *rpt5a-6* under control condition. Values represent mean  $\pm$  standard deviation of three biological replicates. Asterisk indicate significant difference from the *rpt5a-6* in the same condition at  $p < 0.05$  by Dunnett's test.

## 1.2 Supplementary Tables

**Supplementary Table 1.**

|                  |                   |                          |       |
|------------------|-------------------|--------------------------|-------|
| SNP marker       | rpt5a-6_BfuAI_F   | CAGGAGAAGATTAAACTCAAC    |       |
|                  | rpt5a-6_R         | CATGTAATTATTGTTGCCAG     |       |
|                  | nac103-1_F        | AAAGAAGTATCCCAAAGGCG     | *1    |
|                  | nac103-1_R        | ATCGTCATTACCTGAGGAAC     |       |
| Construction     | NAC103_CDS_F      | CACCATGGGGAAAACCTAAGTTG  |       |
|                  | NAC103_CDS_R      | TTAATCGTCCTTAGTCTGAC     |       |
|                  | NAC103ATG-2k_F    | CACCCACTCTTACACATATAC    |       |
|                  | NAC103CDS-TAA_R   | ATCGTCCTTAGTCTGACCGTTG   |       |
|                  | NAC103upperATG_R  | TGGAAGACAAGGGGAAAAC      | *1    |
|                  | NAC103_ATG-200_F  | GATATCTGCAAGAAGAATCC     | *1    |
|                  | NAC103_ATG-1219_F | CTTTCTCAAACCTTGACAAC     | *1    |
|                  | NAC103_ATG-652_R  | AGTGAGTGATGGGGTTTAGG     | *1    |
| Col-0/Ler marker | MTG13_F           | ATTTGCAAGTGTGATGGAA      |       |
|                  | MTG13_R           | TGGTTTCAAGCCTCTGATAATTT  |       |
|                  | MYN8_F            | GTCATGCTCATGAACCTGTTTT   |       |
|                  | MYN8_R            | TTCACAAGGGATTAAGAACCAA   |       |
|                  | MLE2_F            | AAACTTTTGCCCCTTCCTG      |       |
|                  | MLE2_R            | TGATGATTHHHTTGATTCAA     |       |
|                  | MGI19_F           | TGGTCACACTCAAACAAGCA     |       |
|                  | MGI19_R           | CACCATCACCACCAGTATGC     |       |
|                  | T12B11_F          | TATCGGTGATGGTGGTGTG      |       |
|                  | T12B11_R          | CACAGTGTCCCCAAAGTCA      |       |
| qRT-PCR          | NAC103RTPCR_F     | CCTCAAGTATCTCTCGATGG     |       |
|                  | NAC103RTPCR_R     | GATGTCTTACCTCATTATGG     |       |
|                  | Actin8_RT_F       | GCCAGATCTTCATCGTCGTG     |       |
|                  | Actin8_RT_R       | TCTCCAGCGAATCCAACCTT     |       |
|                  | BRCA1_RT_F        | CCATGTATTTTGCAATGCGTG    |       |
|                  | BRCA1_RT_R        | TGTGGAGCACCTCGAATCTCT    |       |
|                  | RAD51_RT_F        | CGAGGAAGGATCTCTTGCGAG    |       |
|                  | RAD51_RT_R        | GCACTAGTGAACCCCAGAGG     |       |
|                  | PARP1_RT_F        | GCTTTGGGAGACATGAATGAAC   | *3 *4 |
|                  | PARP1_RT_R        | AAGTGGAAACAACACCGTCT     | *3 *4 |
|                  | CRT1_RT_F         | AGACCTTAGTCTTCCAATTCTC   | *2    |
|                  | CRT1_RT_R         | CCATTGTAAGTAAGGATAGCATG  | *2    |
|                  | CNX1_RT_F         | ATGAGACAACGGCAACTATTTTCC | *2    |
|                  | CNX1_RT_R         | CCATAATCCTCATGTCCTTCACT  | *2    |
|                  | PDIL_RT_F         | CTCGTGAAGCTGAGGGTATTG    | *2    |
|                  | PDIL_RT_R         | TGTGCGAAATCTAACTCAGAG    | *2    |

## Supplementary Material

|            |                      |    |
|------------|----------------------|----|
| UBC32_RT_F | CAGACACCATAGTTGATGAT | *2 |
| UBC32_RT_R | ACCATGATAGCGATTGTGAG | *2 |

---

\*1 Used for sequencing analysis for vector validation.

\*2 Sun et al., 2013

\*3 Ricaud et al., 2007

\*4 For *PARP2*. In this report, *PARP2* corresponds to AT4G02390, which is referred to as *PARP1* in Ricaud et al., 2007
